# Supplementary material for: Aberration in DNA Methylation in B-Cell Lymphomas Has a Complex Origin and Increases with Disease Severity
Source: PLOS journal article supplement (doi:10.1371/journal.pgen.1003137), 2013-01-10
Supplement: S32 (10.1371/journal.pgen.1003137.s032) [file journal.pgen.1003137.s032]

|                  |       |     |    |   |           |   |
|------------------|-------|-----|----|---|-----------|---|
| 198130           | DLBCL | GCB | 58 | M | 34.529772 | 0 |
| 227453           | DLBCL | ABC | 67 | M | 41.65914  | 0 |
| 227457           | DLBCL | GCB | 78 | M | 43.594524 | 0 |
| 227460           | DLBCL | GCB | 58 | M | 35.646816 | 0 |
| 227461           | DLBCL | GCB | 67 | M | 36.960984 | 0 |
| 227526           | DLBCL | GCB | 77 | M | 39.983568 | 0 |
| 227528           | DLBCL | GCB | 68 | M | 36.566736 | 0 |
| 26361102         | FL    |     | 84 | F |           |   |
| 26364102         | FL    |     | 53 | M |           |   |
| 26365302         | FL    |     | 83 | M |           |   |
| 26371402         | FL    |     | 48 | M |           |   |
| 26375302         | FL    |     | 52 | M |           |   |
| 26394902         | FL    |     | 60 | F |           |   |
| 26405602         | FL    |     | 59 | F |           |   |
| 26407202         | FL    |     | 69 | M |           |   |
| 20198202         | NBC   |     |    |   |           |   |
| 20200602         | NBC   |     |    |   |           |   |
| 20200702         | NBC   |     |    |   |           |   |
| 20209402         | NBC   |     |    |   |           |   |
| 20216902         | NBC   |     |    |   |           |   |
| 129164           | NBC   |     |    |   |           |   |
| 129166           | NBC   |     |    |   |           |   |
| 130587           | NBC   |     |    |   |           |   |
| 20195402         | NGC   |     |    |   |           |   |
| 20200402         | NGC   |     |    |   |           |   |
| 20201702         | NGC   |     |    |   |           |   |
| 20202002         | NGC   |     |    |   |           |   |
| 20204302         | NGC   |     |    |   |           |   |
| 101693           | NGC   |     |    |   |           |   |
| 128811           | NGC   |     |    |   |           |   |
| 130062           | NGC   |     |    |   |           |   |
| 130502           | NGC   |     |    |   |           |   |
| GSM435212_128081 | CD34  |     |    |   |           |   |
| GSM435213_128500 | CD34  |     |    |   |           |   |
| GSM435214_128503 | CD34  |     |    |   |           |   |
| GSM435215_129639 | CD34  |     |    |   |           |   |
| GSM435216_140452 | CD34  |     |    |   |           |   |
| GSM435217_140456 | CD34  |     |    |   |           |   |
| GSM435218_140457 | CD34  |     |    |   |           |   |
| GSM435219_142831 | CD34  |     |    |   |           |   |
